# Supplementary material
Source: publisher site journal article supplement (https://www.dovepress.com/article/343411)
Supplement: Supplementary file 1 [file get_supplementary_file.php]

**Supplementary Table 1** Characteristics of the group with suspicion of cough variant asthma (n=45)

|  | **n=45** |
| --- | --- |
| Age (years) | 60.0 (54.0-68.0) |
| Gender (n females, %) | 37 (82.5%) |
| Smoking history (n ex-smokers, %) | 12 (26.7%) |
| Atopy (n, %) | 21 (46.7%) |
| BMI (kg/m2) | 30.2 (26.2-32.0) |
| Duration of cough (months) | 48.0 (24.0-120.0) |
| Baseline VAS (mm) | 69.0 (43.0-80.0) |
| Baseline LCQ (points) | 10.4 (8.4-12.6) |
| Baseline C2 (μmol/L) | 7.8 (2.0-15.7) |
| Baseline C5 (μmol/L) | 7.8 (3.9-15.7) |
| Blood eosinophil count (cells/μL) | 189.0 (128.3-284.2) |
| IS eosinophil percentage (%) | 1.0 (0.0-4.0) |
| IS neutrophil percentage (%) | 43.0 (34.0-52.0) |
| FeNO (ppb) | 17.5 (13.5-27.1) |
| FEV1 (% predicted) | 86.0 (80.0-100.0) |
| PC20 (mg/mL) | 2.0 (0.8-5.0) |
| UACS (n, %) | 34 (75.6%) |
| GERD (n, %) | 26 (57.8%) |

**Abbreviations:** BMI, body mass index; VAS, visual analogue scale; LCQ, Leicester Cough Questionnaire; C2, the lowest capsaicin concentrations of capsaicin evoking two coughs; C5, the lowest capsaicin concentrations of capsaicin evoking five coughs; IS, induced sputum; FeNO, fractional exhaled nitric oxide; FEV1, forced expiratory volume in 1 second; PC20, provocative concentration of methacholine causing 20% fall in FEV1; UACS, upper airway cough syndrome; GER, gastroesophageal reflux; ΔVAS, change in visual analogue scale from the baseline; ΔLCQ, change in Leicester Cough Questionnaire from the baseline.
